# Supplementary material
Source: PubMed Central journal article supplement (PMC4372698)
Supplement: MCB.01446-14_zmb999100785so2.pdf [file MCB.01446-14_zmb999100785so2.pdf]

**Supplementary Table 1**

| SiRNA ID            | Sequence 5'-3'                |
|---------------------|-------------------------------|
| AID Sense #2        | AAGCAACCUCCUGGAAUGU[dT][dT]   |
| AID Anti-Sense #2   | ACAUUCCAGGAGGUUGCUU[dT][dT]   |
| AID Sense #3        | CGAGAUGCAUUUCGUAUGU[dT][dT]   |
| AID Anti-Sense #3   | ACAUACGAAAUGCAUCUCG[dT][dT]   |
| SOCS1 Sense #1      | CUACCYGAGUUCUUCUCC[dT][dT]    |
| SOCS1 Anti-Sense #1 | GGGGAAGGAACUCAGGUAG[dT][dT]   |
| SOCS1 Sense #2      | CCUCCGCUCCACUCCGA[dT][dT]     |
| SOCS1 Anti-Sense #2 | UCGGAGUGGGAGCGGAAGG[dT][dT]   |
| P53 Sense #1        | AAGUCUGUUAUGUGCACGUAC[dT][dT] |
| P53 Anti-Sense #1   | GUACGUGCACAUAACAGACUU[dT][dT] |
| P53 Sense #2        | CCACUUGAUGGAGAGUAUU[dT][dT]   |
| P53 Anti-Sense #2   | AAUACUCUCCAUCAAGUGG[dT][dT]   |

**Supplementary Table 2**

| primers ID      | Sequence 5'-3'       |
|-----------------|----------------------|
| p15 Forward     | AGATCCCAACGCCCTGAACC |
| p15 Reverse     | CAGTTGGGTTCTGCTCCGTG |
| p16 Forward     | GAACTCTTCGGTCGTACCC  |
| p16 Reverse     | GCACCGTAGTTGAGCAGAAG |
| p21 Forward     | GTCAGAGTCTAGGGGAATTG |
| p21 Reverse     | TCGGACATCACCAGGATTGG |
| p57 Forward     | CCAATGCGAACGACTTCTTC |
| p57 Reverse     | CAGATGCCAGCAAGTTCTC  |
| cdc25c Forward  | AGCTTCTTTGTAGTACTCCG |
| cdc25c Reverse  | ACACAGAGGAGAAGTCAGAG |
| GADD45a Forward | TAGTGAGCTGCTGCTACTG  |
| GADD45a Reverse | GATCCATGTAGCGACTTTCC |
| PCNA Forward    | CGAGACCTTAGCCATTGG   |
| PCNA Reverse    | CTGTAGGAGACAGTGGAGTG |
